# Supplementary material for: TMV-Cg Coat Protein stabilizes DELLA proteins and in turn negatively modulates salicylic acid-mediated defense pathway during Arabidopsis thaliana viral infection
Source: PubMed Central journal article supplement (PMC4422269; doi:10.1186/s12870-014-0210-x), 2014-08-03

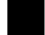

quadruple-DELLA

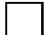

*gai-1*

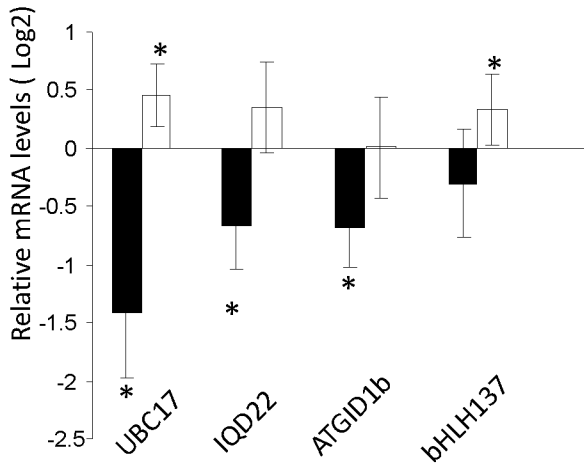

Supplement: s12870-014-0210-x-S4.pdf [file s12870-014-0210-x-S4.pdf]
